# Supplementary material
Source: publisher site journal article supplement (https://www.spandidos-publications.com/1528/downloadSupplementary)

Figure S1. Quantification of hsa-miR-30d-5p *in vitro* reverse transcription-PCR. *In vitro* study, hsa-miR-30d-5p was upregulated in the medium of the sorafenib-effective group when compared with the non-effective group 48 h after sorafenib administration. miR, microRNA; RQ, relative quantification.

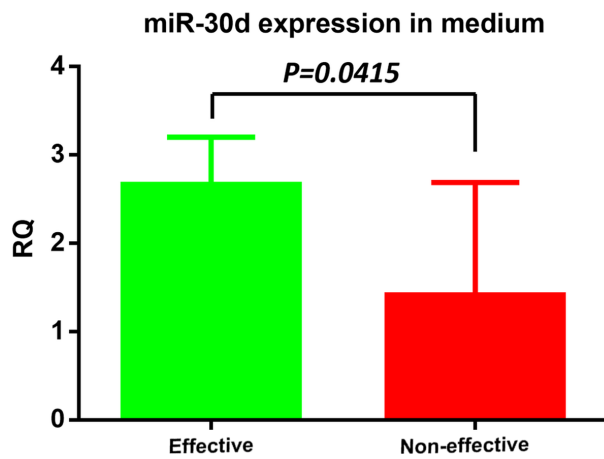

Supplement: Supplementary file 1 [file downloadSupplementary]
